# Supplementary material for: Imidazole tailored deep eutectic solvents for CO2 capture enhanced by hydrogen bonds
Source: Royal Society of Chemistry journal article supplement (doi:10.1039/c5cp04050g), 2015-01-01
Supplement: c5cp04050g1.pdf [file c5cp04050g1.pdf]

# Imidazole tailored deep eutectic solvents for CO<sub>2</sub> capture enhanced by hydrogen bond

Lingdi Cao,<sup>a, b, c</sup> Junhua Huang,<sup>c, d</sup> Xiangping Zhang,<sup>a</sup> Suojiang Zhang,<sup>\*a</sup> Jubao

Gao<sup>a, b</sup> and Shaojuan Zeng<sup>a, b</sup>

<sup>a</sup> *Beijing Key Laboratory of Ionic Liquids Clean Process, State Key Laboratory of Multiphase Complex Systems, Key Laboratory of Green Process and Engineering, Institute of Process Engineering, Chinese Academy of Sciences, Beijing 100190, China*

<sup>b</sup> *College of Chemistry and Chemical Engineering, University of Chinese Academy of Sciences, Beijing 100049, China*

<sup>c</sup> *CSIRO Energy Technology, Clayton South, VIC 3169, Australia*

<sup>d</sup> *School of Chemistry, Monash University, Clayton, VIC 3800, Australia*

\*Corresponding author: [sjzhang@ipe.ac.cn](mailto:sjzhang@ipe.ac.cn)

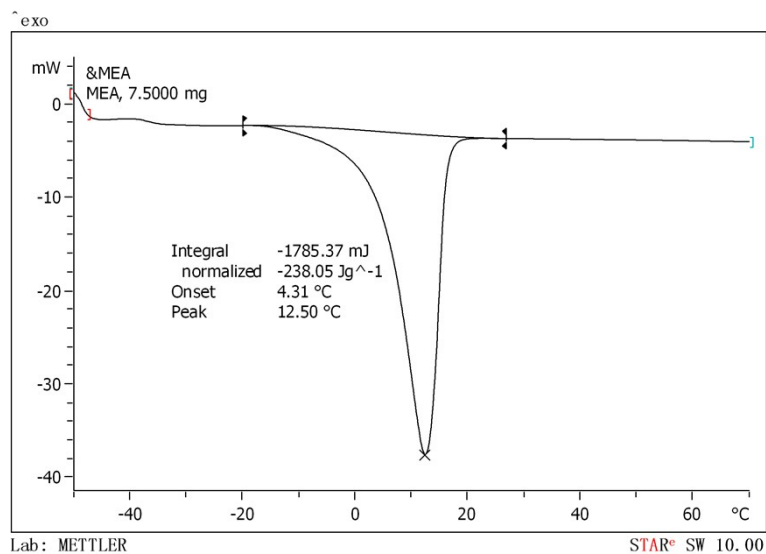

**Fig. S1** DSC trace of pure MEA.

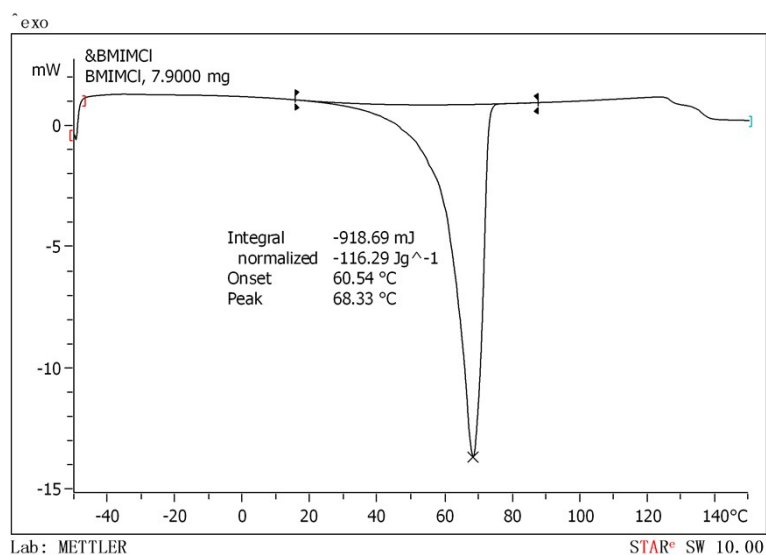

**Fig. S2** DSC trace of pure BMIMCl.

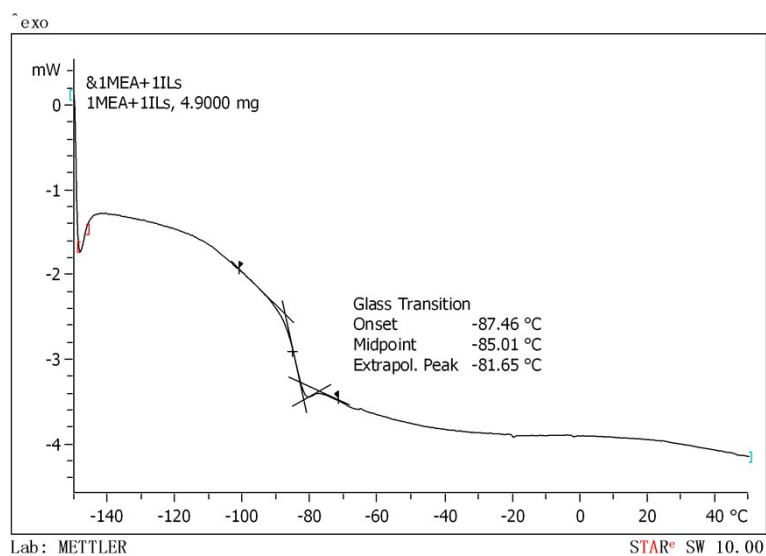

**Fig. S3** DSC trace of MEA:ILs(1:1).

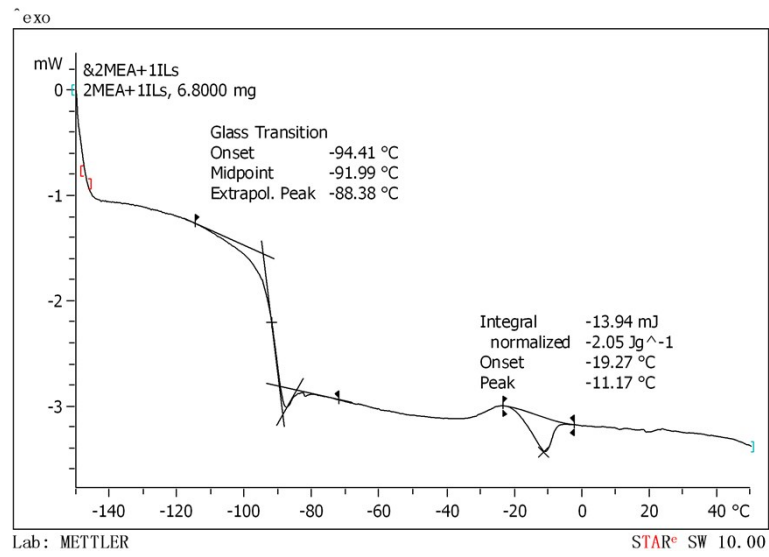

**Fig. S4** DSC trace of MEA:ILs(2:1).

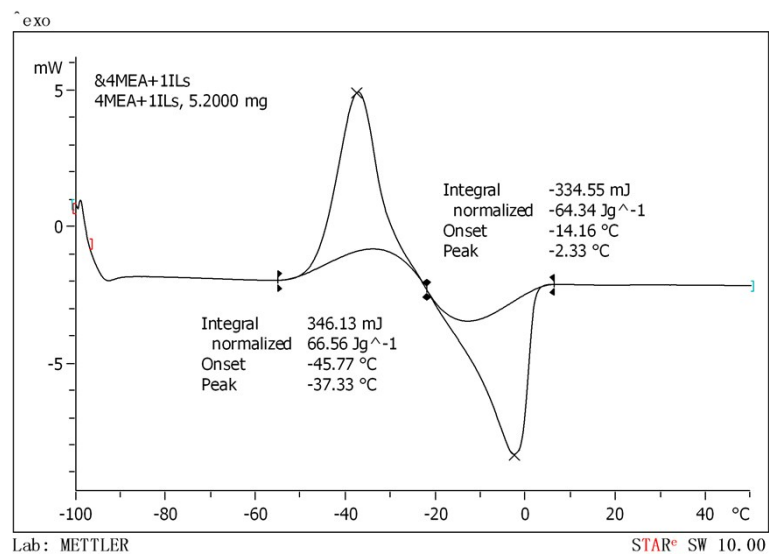

**Fig. S5** DSC trace of MEA:ILs(4:1).

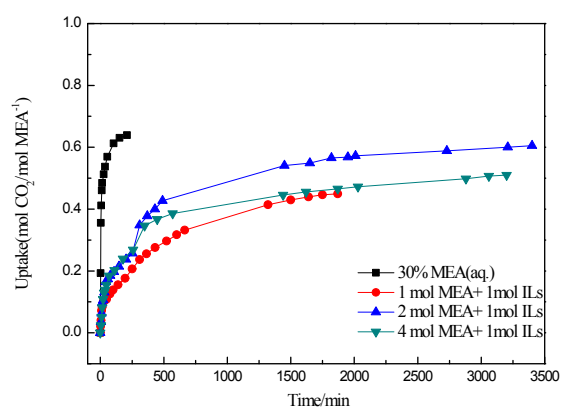

**Fig. S6** CO<sub>2</sub> uptake as a function of bubbling time at room temperature.

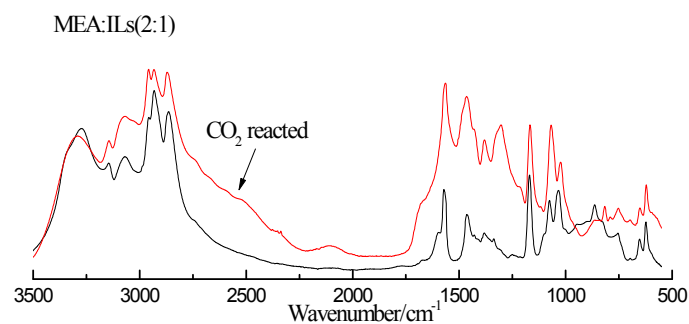

**Fig. S7** ATR-IR spectra of MEA:ILs(2:1) before and after CO<sub>2</sub> absorption.

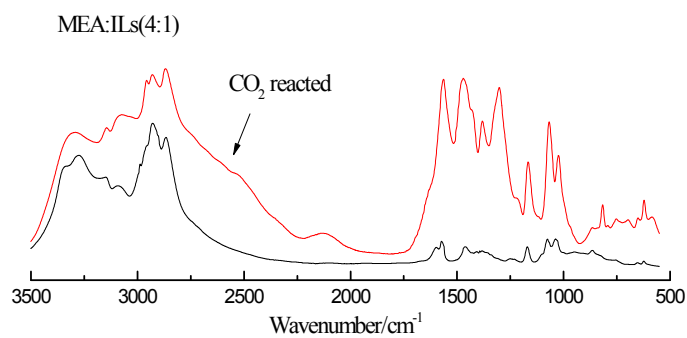

**Fig. S8** ATR-IR spectra of MEA:ILs(4:1) before and after CO<sub>2</sub> absorption.

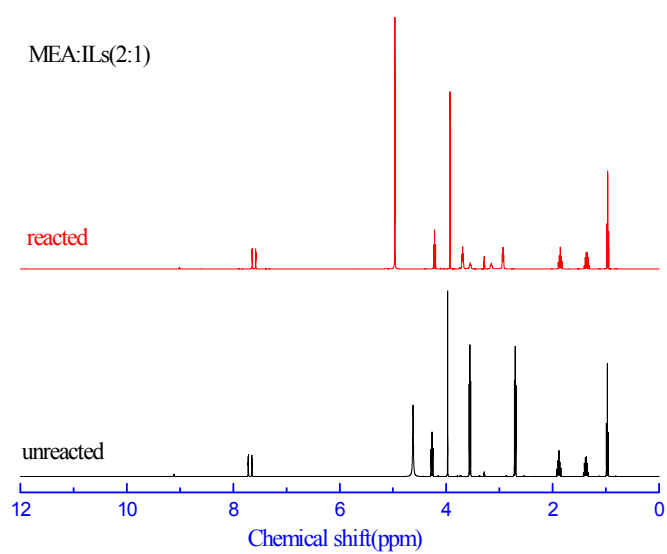

**Fig. S9** <sup>1</sup>H NMR spectra of MEA:ILs(2:1) before and after CO<sub>2</sub> absorption.

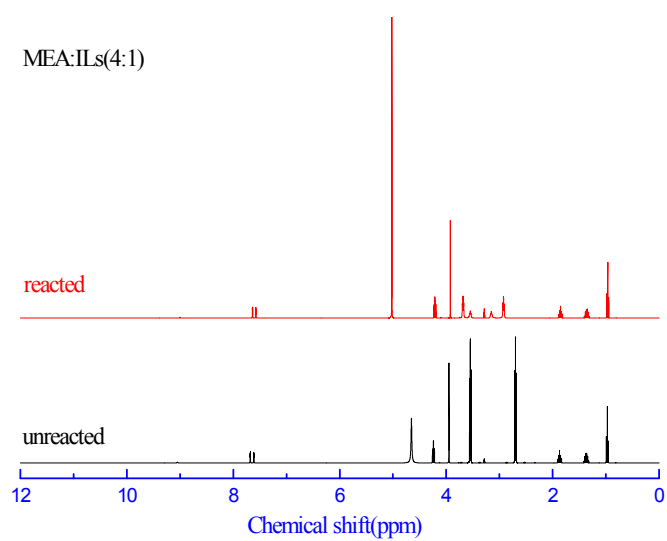

**Fig. S10** <sup>1</sup>H NMR spectra of MEA:ILs(4:1) before and after CO<sub>2</sub> absorption.

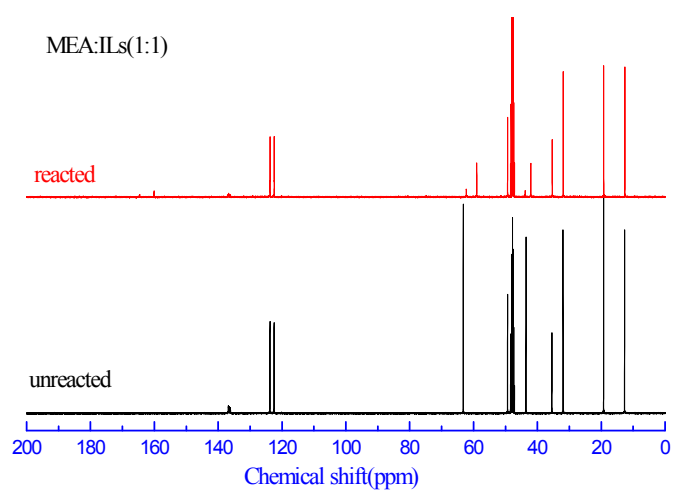

**Fig. S11** <sup>13</sup>C NMR spectra of MEA:ILs(1:1) before and after CO<sub>2</sub> absorption.

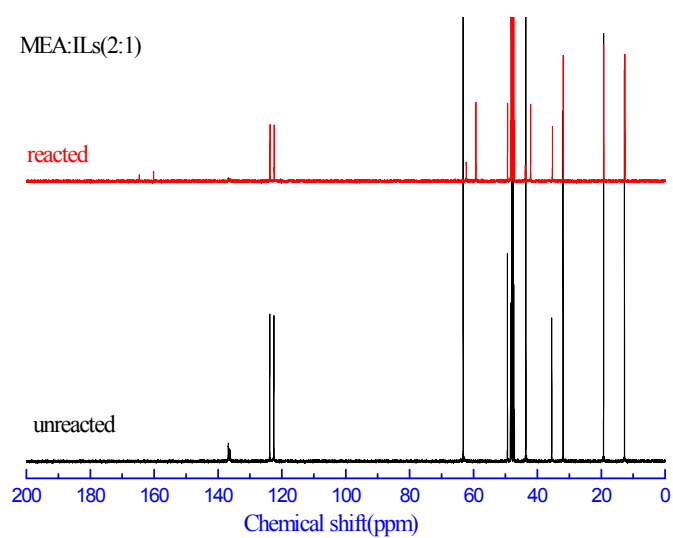

**Fig. S12** <sup>13</sup>C NMR spectra of MEA:ILs(2:1) before and after CO<sub>2</sub> absorption.

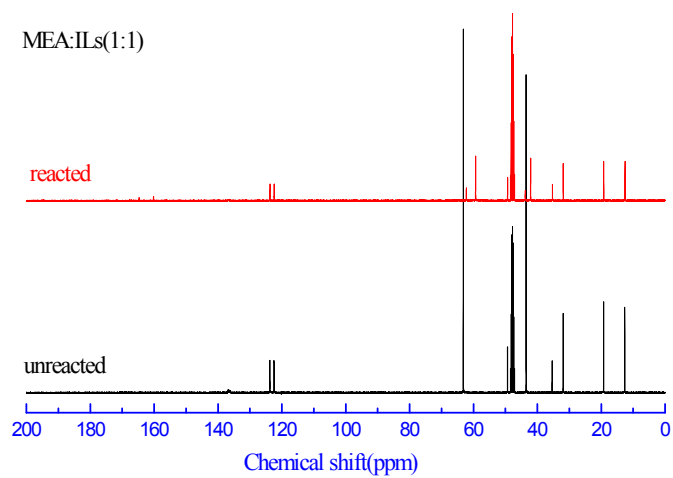

**Fig. S13**  $^{13}\text{C}$  NMR spectra of MEA:ILs(4:1) before and after  $\text{CO}_2$  absorption.

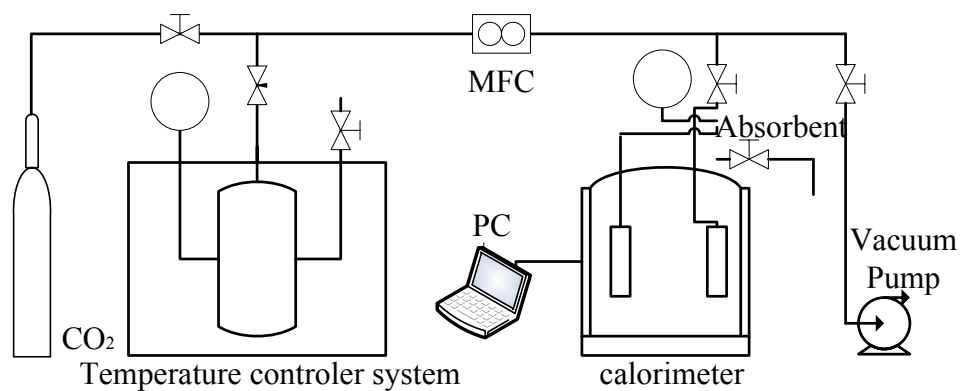

**Fig. S14** Experimental setup of calorimeter BT 2.15.

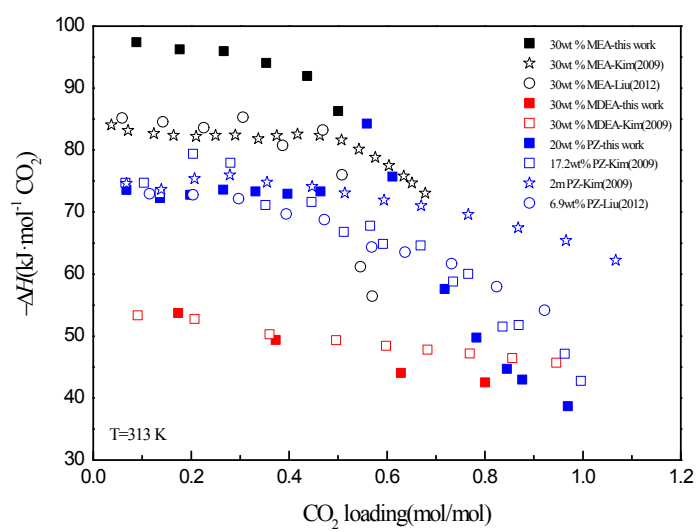

**Fig. S15** Heat of absorption of  $\text{CO}_2$  in aqueous solution of MEA, MDEA and PZ.
